# Supplementary material for: Foot deformation analysis with different load-bearing conditions to enhance diabetic footwear designs
Source: PLoS One. 2022 Mar 23;17(3):e0264233. doi: 10.1371/journal.pone.0264233 (PMC8942268; doi:10.1371/journal.pone.0264233)
Supplement: S1 Data — (XLSX) [file pone.0264233.s002.xlsx]

## Sheet: Sheet1
Subject No.	Age (years)	Years of Diagnosis of Diabetes Mellitus (yr)	Gender (M=0, F=1)	Body height (cm)	Body mass (kg)	BMI (kg/m2)	Foot size (Euro)	Dominant leg
S1	63	63	1	164	59	21.9363	40	L
S2	71	25	1	149	54	24.3232	37	L
S4	65	18	1	162	59	22.4813	39	L
S5	68	28	0	163	70.5	26.5347	38	R
S6	75	8	1	154.5	56	23.4602	39	R
S7	63	10	1	166	62	22.4996	40	R
S8	56	8	1	169	64	22.4082	42	R
S9	67	20	1	154	48	20.2395	37	R
S10	62	4	0	164.5	69	25.4987	39	L
S11	57	18	1	151.5	64	27.884	37	L
S12	65	13	1	160	73.5	28.7109	38	R
S13	62	21	0	172	60	20.2812	41	R
S15	56	2	1	165	91	33.4252	42	R
S16	57	5	1	158.5	60	23.8832	39	R
S17	70	5	0	157	54	21.9076	39	R
S18	64	14	1	158	58	23.2335	37	R
S19	63	5	1	156	60	24.6548	38	R
S20	66	11	0	175	82	26.7755	41	R
S21	61	2	1	153	72	30.7574	38	R
S22	69	3	1	156	46	18.902	38	L
S23	60	11	0	168.5	61.5	21.6608	40	R
S24	60	11	0	166	65	23.5883	42	L
S25	60	23	1	158	69	27.6398	39	R
S26	66	2	1	151	52	22.806	39	R
S27	65	30	1	159	51.5	20.371	41	R
S28	71	11	0	155	54	22.4766	38	R
S29	66	5.5	0	170	67	23.1834	40	R
S30	60	8	1	165.5	51.5	18.8023	41	R
S31	67	12	0	160	59	23.0469	40	R
S32	59	23	1	153.5	60.5	25.6767	38	R
S33	72	31	0	167	71.5	25.6373	42	R
S34	65	8	0	158.5	65	25.8735	40	R
S35	61	1	1	167.5	87.5	31.1873	39	R
S36	71	20	0	163.5	53	19.8262	41	R
S37	71	2	1	154	56	23.6128	39	R
S38	65	5	1	152	42	18.1787	37	R
S39	57	20	1	165	49.5	18.1818	38	R
S40	68	1	0	169	58.5	20.4825	41	R
S41	66	1	1	160	58.5	22.8516	40	R
S42	70	8	0	181	73	22.2826	43	R
S43	66	5	0	169	55	19.257	42	R
S44	66	21	1	160.5	68	26.3973	40	R
S45	62	1	0	169	74	25.9095	42	R
S46	64	31	1	154.5	52	21.7844	38	R
S47	60	1	0	166	65	23.5883	40	R
S48	63	21	0	175	65	21.2245	42	R
S49	71	1	1	157	65	26.3702	38	R
S50	70	6	1	154	52	21.9261	38	R
